# Supplementary material for: Plasma fetal bile acids 7α-hydroxy-3-oxochol-4-en-24-oic acid and 3-oxachola-4,6-dien-24-oic acid indicate severity of liver cirrhosis
Source: PubMed Central journal article supplement (PMC8050265; doi:10.1038/s41598-021-87921-5), 2021-04-15
Supplement: 41598_2021_87921_MOESM1_ESM.pdf [file 41598_2021_87921_MOESM1_ESM.pdf]

Plasma fetal bile acids 7 $\alpha$ -hydroxy-3-oxochol-4-en-24-oic acid and 3-oxachola-4,6-dien-24-oic acid indicate the severity of liver cirrhosis

Tudor Mocan, Dong Wook Kang, Billy J. Molloy, Hyeonho Jeon, Zeno A. Spârchez, Diren Beyođlu and Jeffrey R. Idle

### **Supplementary Materials**

## Supplementary spectral data

### Compound 4 (Fig. 4)

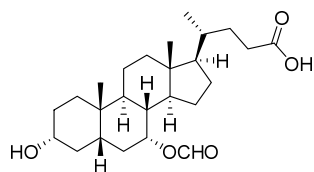

**(R)-4-((3R,5S,7R,8R,9S,10S,13R,14S,17R)-7-(formyloxy)-3-hydroxy-10,13-dimethylhexadecahydro-1H-cyclopenta[a]phenanthren-17-yl)pentanoic acid (4).**

Prepared according to the procedure b.  $^1\text{H}$  NMR (400 MHz,  $\text{CDCl}_3$ )  $\delta$  8.08 (d,  $J=1.0$  Hz, 1H), 5.02 (d,  $J=3.2$  Hz, 1H), 3.50 (td,  $J=11.0, 5.5$  Hz, 1H), 2.40 (ddd,  $J=15.4, 10.1, 5.2$  Hz, 1H), 2.26 (ddd,  $J=15.9, 9.6, 6.6$  Hz, 1H), 2.17 (s, 2H), 2.07–1.94 (m, 3H), 1.83 (tdd,  $J=13.7, 7.4, 3.6$  Hz, 3H), 1.72–1.40 (under water peak, m, 7H), 1.40–1.23 (m, 6H), 1.22–0.97 (m, 4H), 0.96–0.91 (m, 4H), 0.90–0.78 (m, 1H), 0.66 (s, 2H).

### Compound 5 (Fig. 4)

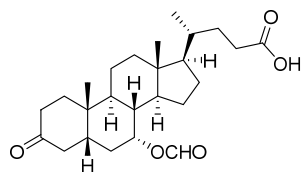

**(R)-4-((5R,7R,8R,9S,10S,13R,14S,17R)-7-(formyloxy)-10,13-dimethyl-3-oxohexadecahydro-1H-cyclopenta[a]phenanthren-17-yl)pentanoic acid (5).**

Prepared according to the procedure c.  $^1\text{H}$  NMR (400 MHz,  $\text{CDCl}_3$ )  $\delta$  8.06 (d,  $J=1.0$  Hz, 1H), 5.12 (d,  $J=3.2$  Hz, 1H), 3.02 (dd,  $J=15.2, 13.8$  Hz, 1H), 2.46–2.32 (m, 2H), 2.32–2.24 (m, 1H), 2.24–2.16 (m, 1H), 2.15–2.06 (m, 2H), 2.04–1.92 (m, 3H), 1.91–1.77 (m, 3H), 1.73–1.65 (m, 3H), 1.60–1.52 (m, 2H), 1.51–1.30 (m, 7H), 1.29–1.23 (m, 1H), 1.22–1.07 (m, 2H), 1.04 (s, 2H), 0.95 (d,  $J=6.5$  Hz, 2H), 0.70 (s, 2H).

### Compound 6 (Fig. 4)

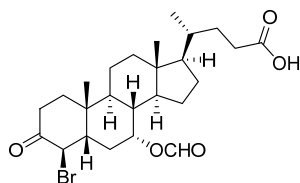

**(R)-4-((4R,5S,7R,8S,9S,10R,13R,14S,17R)-4-bromo-7-(formyloxy)-10,13-dimethyl-3-oxohexadecahydro-1H-cyclopenta[a]phenanthren-17-yl)pentanoic acid (6).**

Prepared according to the procedure d.  $^1\text{H}$  NMR (400 MHz,  $\text{CDCl}_3$ )  $\delta$  8.08 (d,  $J=4.7$  Hz, 1H), 5.34 (d,  $J=11.8$  Hz, 1H), 5.17 (d,  $J=3.2$  Hz, 1H), 2.65–2.49 (m, 2H), 2.41 (ddd,  $J=15.4, 10.0, 5.2$  Hz, 1H), 2.27 (ddd,  $J=17.8, 9.6, 6.6$  Hz, 1H), 2.21–2.13 (m, 2H), 2.09–2.01 (m, 1H), 2.01–1.93 (m, 2H), 1.93–1.70 (m, 3H), 1.61–1.50 (m, 2H), 1.50–1.31 (m, 5H), 1.30–1.22 (m, 1H), 1.22–1.12 (m, 2H), 1.11 (s, 2H), 0.98–0.91 (m, 3H), 0.70 (s, 2H).

### Compound 7 (Fig. 4)

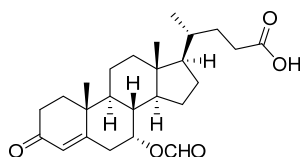

**(R)-4-((7R,8S,9S,10R,13R,14S,17R)-7-(formyloxy)-10,13-dimethyl-3-oxo-2,3,6,7,8,9,10,11,12,13,14,15,16,17-tetradecahydro-1H-cyclopenta[a]phenanthren-17-yl)pentanoic acid (7).** Prepared according to the procedure e.  $^1\text{H}$  NMR (400 MHz,  $\text{CDCl}_3$ )  $\delta$  8.05 (d,  $J=3.8$  Hz, 1H), 5.17 (s, 1H), 2.68–2.50 (m, 1H), 2.50–2.33 (m, 2H), 2.33–2.19 (m, 2H), 2.20–1.99 (m, 3H), 1.93–1.67 (m, 4H), 1.64–1.42 (m, 5H), 1.39–1.07 (m, 9H), 1.01–0.87 (m, 3H), 0.79–0.65 (m, 2H).

### UPLC-TQMS characteristics of 16 free and conjugated bile acids

**Supplementary Table S1.** Details of the ultraperformance liquid chromatography-triple quadrupole mass spectrometry assay for 15 free and conjugated bile acids

| Bile acid                          | Retention Time (min) | MRM transition  | Cone voltage (V) | Collision energy (eV) |
|------------------------------------|----------------------|-----------------|------------------|-----------------------|
| Lithocholic acid (LCA)             | 0.90                 | 375.25 > 375.25 | 60               | 32                    |
| Deoxycholic acid (DCA)             | 0.83                 | 391.25 > 391.25 | 60               | 16                    |
| Glycolithocholic acid (GLCA)       | 0.82                 | 432.25 > 74.00  | 60               | 35                    |
| Chenodeoxycholic acid (CDCA)       | 0.80                 | 391.25 > 391.25 | 60               | 16                    |
| Taurolithocholic acid (TLCA)       | 0.71                 | 482.25 > 80.00  | 60               | 60                    |
| Glycodeoxycholic acid (GDCA)       | 0.70                 | 448.25 > 74.00  | 60               | 35                    |
| Glycochenodeoxycholic acid (GCDCA) | 0.67                 | 448.25 > 74.00  | 60               | 35                    |
| Cholic acid (CA)                   | 0.66                 | 407.25 > 343.25 | 60               | 34                    |
| Ursodeoxycholic acid (UDCA)        | 0.66                 | 391.25 > 391.25 | 60               | 16                    |
| Taurodeoxycholic acid (TDCA)       | 0.60                 | 498.25 > 80.00  | 60               | 60                    |
| Taurochenodeoxycholic acid (TCDCA) | 0.57                 | 498.25 > 80.00  | 60               | 60                    |
| Glycocholic acid (GCA)             | 0.55                 | 464.25 > 74.00  | 60               | 34                    |
| Taurocholic acid (TCA)             | 0.46                 | 514.25 > 80.00  | 60               | 64                    |
| Tauroursodeoxycholic acid (TUDCA)  | 0.44                 | 498.25 > 80.00  | 60               | 60                    |
| Glycoursodeoxycholic acid (GUDCA)  | 0.52                 | 448.25 > 74.00  | 60               | 35                    |

Primary bile acids (CA and CDCA) and their glycine and taurine conjugates are shaded green.
